# Supplementary material for: Analyzing the Effects of Planting Date on the Uncertainty of CERES-Maize and Its Potential to Reduce Yield Gap in Arid and Mediterranean Climates
Source: MDPI journal article supplement (doi:10.3390/agriculture13081514), 2023-07-28
Supplement: s1 [file s1]

## Supplementary

S1: Average and SD amount of soil properties in four studied regions (Isfahan-Borkhar (RG1), Falavarjan (RG2), Golpayegan (RG3) and Fereydan (RG4))

|     | Profile        | Clay (%) |       | Silt (%) |       | Coarse fraction (%) |       | Organic carbon (%) |      |
|-----|----------------|----------|-------|----------|-------|---------------------|-------|--------------------|------|
|     |                | Average  | SD    | Average  | SD    | Average             | SD    | Average            | SD   |
| RG1 | Pr1            | 27.34    | 11.56 | 31.86    | 14.58 | 26.28               | 15.23 | 0.50               | 0.69 |
|     | Pr2            | 27.17    | 11.64 | 31.61    | 14.55 | 26.16               | 15.17 | 0.49               | 0.67 |
|     | Pr3            | 27.35    | 11.54 | 31.95    | 14.54 | 26.30               | 15.18 | 0.50               | 0.68 |
|     | <b>Average</b> | 27.29    |       | 31.81    |       | 26.25               |       | 0.50               |      |
| RG2 | Pr1            | 27.91    | 9.95  | 31.57    | 12.98 | 25.17               | 12.83 | 0.64               | 0.77 |
|     | Pr2            | 27.76    | 10.14 | 31.93    | 12.75 | 25.58               | 13.13 | 0.64               | 0.79 |
|     | Pr3            | 27.65    | 10.15 | 31.57    | 12.84 | 25.67               | 13.36 | 0.65               | 0.79 |
|     | <b>Average</b> | 27.77    |       | 31.69    |       | 25.47               |       | 0.64               |      |
| RG3 | Pr1            | 27.41    | 9.77  | 35.36    | 13.79 | 29.13               | 15.2  | 0.63               | 0.87 |
|     | Pr2            | 27.63    | 9.6   | 35.83    | 13.29 | 29.02               | 15.01 | 0.65               | 0.86 |
|     | Pr3            | 27.45    | 9.72  | 35.87    | 13.45 | 29.03               | 14.92 | 0.64               | 0.86 |
|     | <b>Average</b> | 27.50    |       | 35.69    |       | 29.06               |       | 0.64               |      |
| RG4 | Pr1            | 29.85    | 10.13 | 35.81    | 13.28 | 27.66               | 14.35 | 0.84               | 0.85 |
|     | Pr2            | 29.99    | 10.07 | 35.73    | 13.15 | 27.80               | 14.37 | 0.83               | 0.85 |
|     | Pr3            | 29.93    | 10.02 | 35.75    | 13.18 | 27.56               | 14.31 | 0.83               | 0.85 |
|     | <b>Average</b> | 29.92    |       | 35.76    |       | 27.67               |       | 0.83               |      |

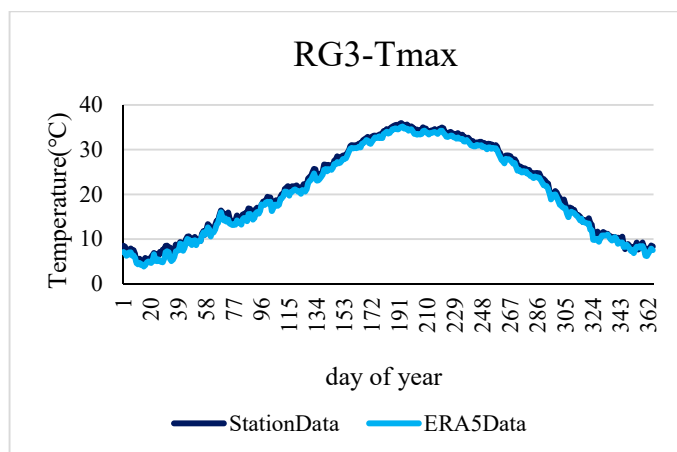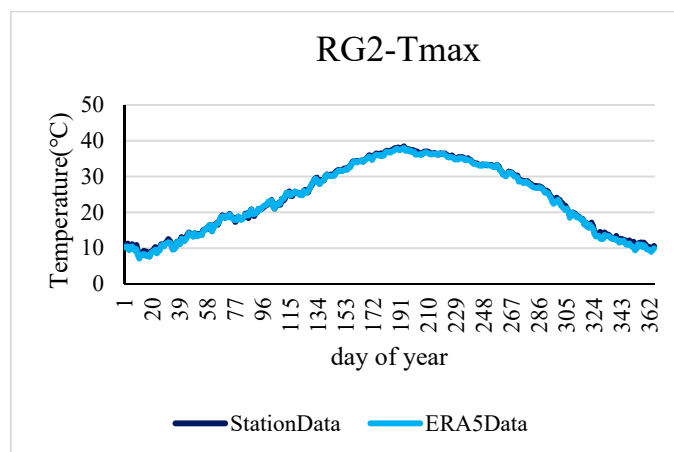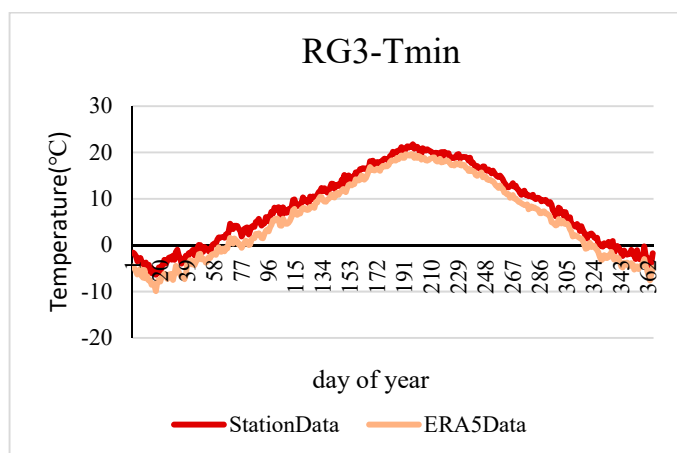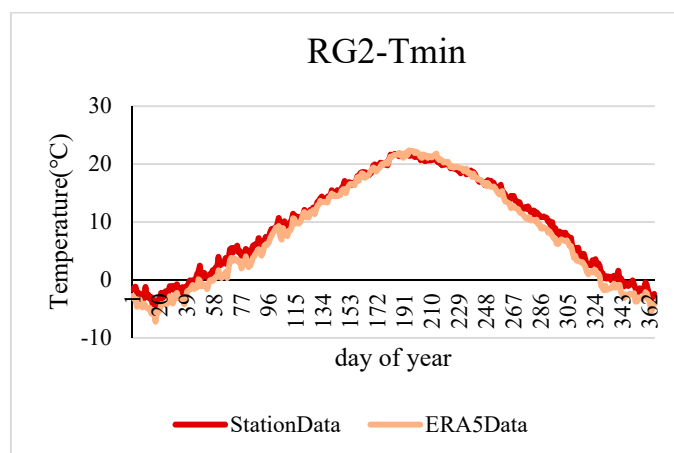

S2: Comparison of maximum and minimum temperatures between nearest station data and ERA5 data in regions RG2 and RG3 throughout the year

S3: Maximum, minimum temperature and precipitation over the crop growth season on the planting date of 18 May (PD1), 18 June (PD2) and 8 July (PD3) in four studied regions (Isfahan-Borkhar (RG1), Falavarjan (RG2), Golpayegan (RG3) and Fereydan (RG4))

| Planting Date | Regions | Parameter  |            |           |              |
|---------------|---------|------------|------------|-----------|--------------|
|               |         | Tmax       | Tmin       | PRCP      | SeasonLength |
|               |         | (°C)       | (°C)       | (mm)      | (day)        |
| PD-1          | RG1     | 33.2 ± 0.4 | 18.5 ± 0.3 | 3.9 ± 3.0 | 94 ± 2       |

|             |     |            |            |             |          |
|-------------|-----|------------|------------|-------------|----------|
|             | RG2 | 32.8 ± 0.4 | 18.1 ± 0.4 | 2.9 ± 2.8   | 95 ± 2   |
|             | RG3 | 30.2 ± 0.5 | 16.0 ± 0.4 | 13.1 ± 10.1 | 108 ± 5  |
|             | RG4 | 27.2 ± 0.6 | 14.2 ± 0.4 | 22.7 ± 15.0 | 126 ± 5  |
| <b>PD-2</b> | RG1 | 33.3 ± 0.7 | 18.7 ± 0.5 | 2.5 ± 3.1   | 96 ± 4   |
|             | RG2 | 32.9 ± 0.7 | 18.4 ± 0.5 | 2.1 ± 3.1   | 97 ± 4   |
|             | RG3 | 28.8 ± 1.1 | 14.6 ± 0.9 | 15.0 ± 14.2 | 126 ± 11 |
|             | RG4 | 25.1 ± 0.7 | 12.4 ± 0.4 | 42.8 ± 34.2 | 143 ± 5  |
| <b>PD-3</b> | RG1 | 30.2 ± 1.0 | 15.6 ± 0.8 | 6.1 ± 7.6   | 116 ± 6  |
|             | RG2 | 29.5 ± 1.1 | 14.8 ± 0.8 | 6.2 ± 7.7   | 121 ± 7  |
|             | RG3 | 26.2 ± 0.8 | 12.3 ± 0.6 | 28.3 ± 21.7 | 129 ± 7  |
|             | RG4 | 24.8 ± 0.6 | 12.2 ± 0.4 | 34.1 ± 26.3 | 125 ± 6  |

S4: Result of ANOVA analysis for soil and weather indexes and their interaction on the planting date of 18 May (PD1), 18 June (PD2) and 8 July (PD3) in four studied regions (Isfahan-Borkhar (RG1), Falavarjan (RG2), Golpayegan (RG3) and Fereydan (RG4))

| Regions        | RG1                |                    |                    | RG2                |                    |                    | RG3                |                    |                     | RG4                |                    |                    |
|----------------|--------------------|--------------------|--------------------|--------------------|--------------------|--------------------|--------------------|--------------------|---------------------|--------------------|--------------------|--------------------|
| Planting Date  | PD-1               | PD-2               | PD-3               | PD-1               | PD-2               | PD-3               | PD-1               | PD-2               | PD-3                | PD-1               | PD-2               | PD-3               |
| soil           | 1.00 <sup>ns</sup> | 1.00 <sup>ns</sup> | .999 <sup>ns</sup> | .998 <sup>ns</sup> | .999 <sup>ns</sup> | 1.00 <sup>ns</sup> | .977 <sup>ns</sup> | .944 <sup>ns</sup> | .929 <sup>ns</sup>  | .977 <sup>ns</sup> | .801 <sup>ns</sup> | .944 <sup>ns</sup> |
| weather        | .998 <sup>ns</sup> | .987 <sup>ns</sup> | .995 <sup>ns</sup> | .912 <sup>ns</sup> | .982 <sup>ns</sup> | .907 <sup>ns</sup> | .94 <sup>ns</sup>  | .883 <sup>ns</sup> | .496 <sup>ns</sup>  | .681 <sup>ns</sup> | .330 <sup>ns</sup> | .496 <sup>ns</sup> |
| soil * weather | 1.00 <sup>ns</sup> | 1.000 <sup>ns</sup> | 1.00 <sup>ns</sup> | 1.00 <sup>ns</sup> | 1.00 <sup>ns</sup> |
